# Supplementary material for: Polyunsaturated fatty acids-induced ferroptosis suppresses pancreatic cancer growth
Source: PubMed Central journal article supplement (PMC10884029; doi:10.1038/s41598-024-55050-4), 2024-02-22

# Supplemental Fig.1

WB image (Fig. 1D) for cleaved caspase3 in MIA-Paca2 was cropped from this image

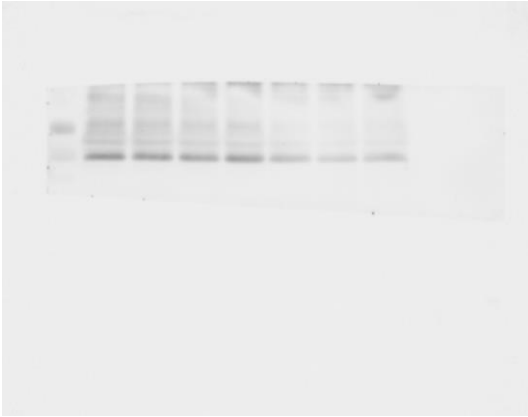

WB image (Fig. 1D) for cleaved caspase3 in Suit-2 was cropped from this image

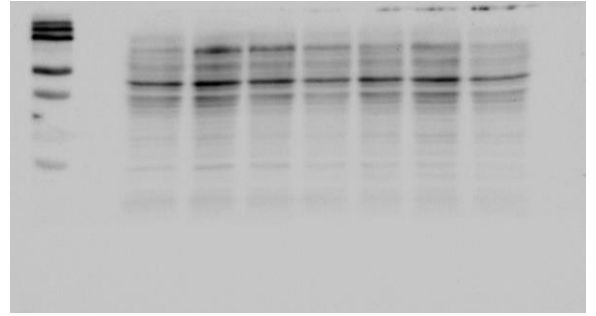

WB image (Fig. 1D) for caspase3 in MIA-Paca2 was cropped from this image

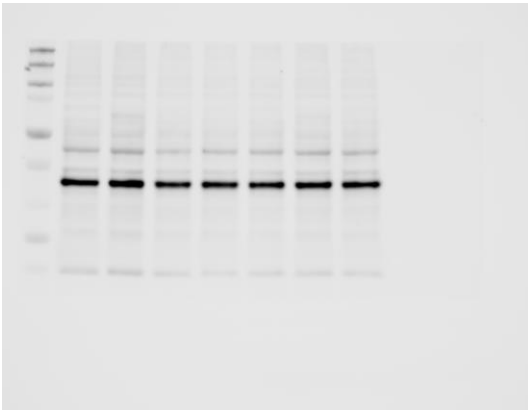

WB image (Fig. 1D) for caspase3 in Suit-2 was cropped from this image

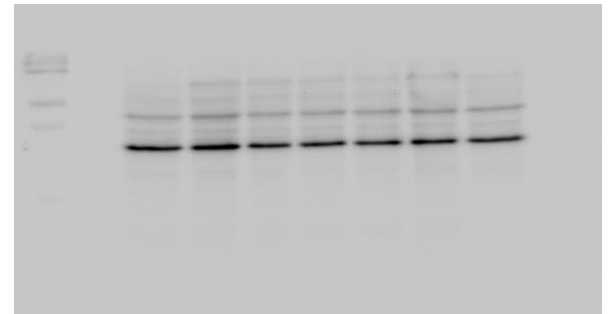

# Supplemental Fig.2

WB image (Fig. 3A) for pRIP3 (Ser166)  
was cropped from this image

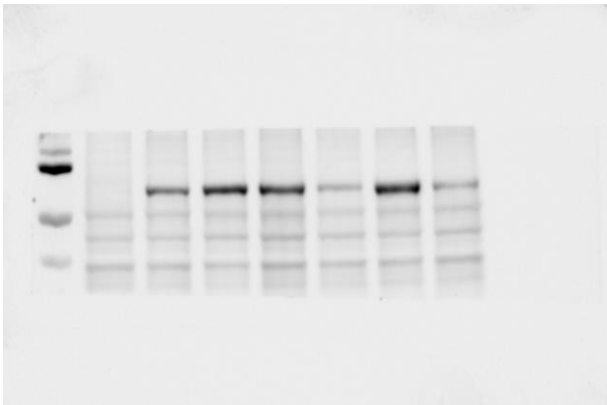

WB image (Fig. 3A) for RIP  
was cropped from this image

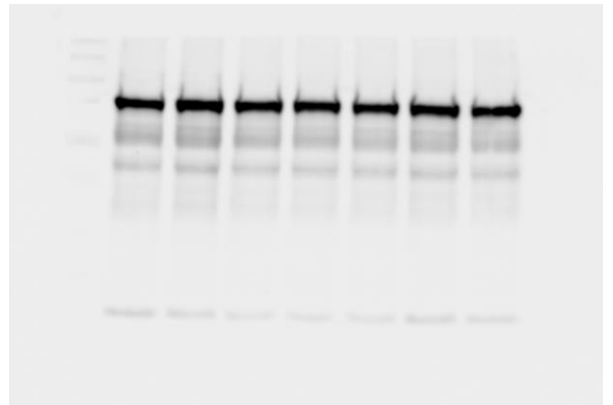

WB image (Fig. 3A) for pMLKL(Ser358)  
was cropped from this image

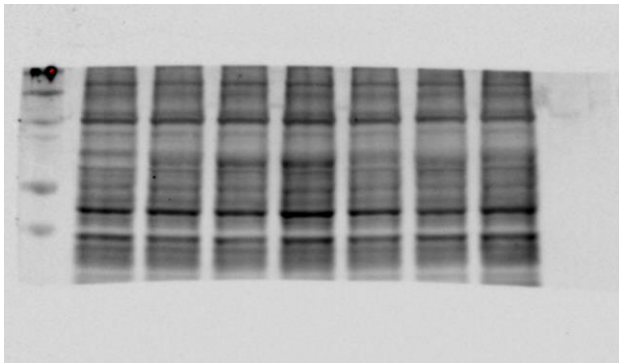

WB image (Fig. 3A) for MLKL  
was cropped from this image

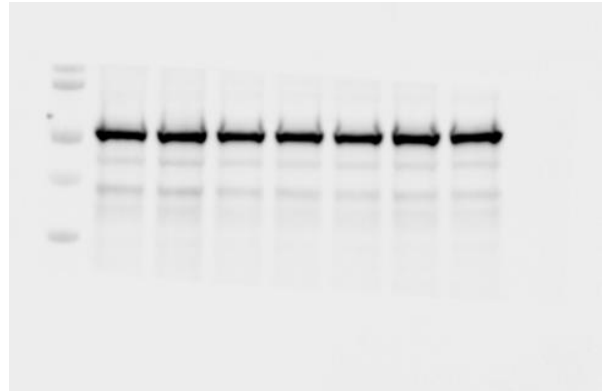

WB image (Fig. 3A) for GPX4  
was cropped from this image

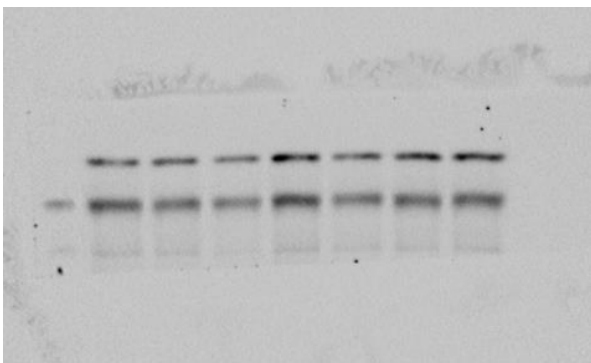

WB image (Fig. 3A) for  $\beta$ actin  
was cropped from this image

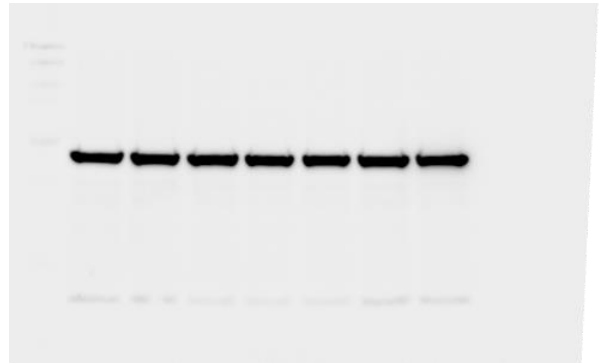

# Supplemental Fig.2 continued

WB image (Fig. 3B) for pRIP3 (Ser166)  
was cropped from this image

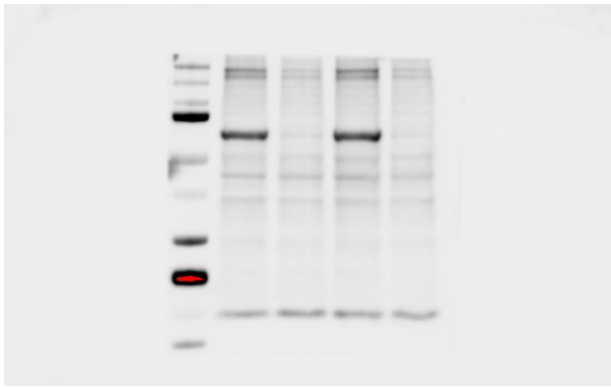

WB image (Fig. 3B) for RIP  
was cropped from this image

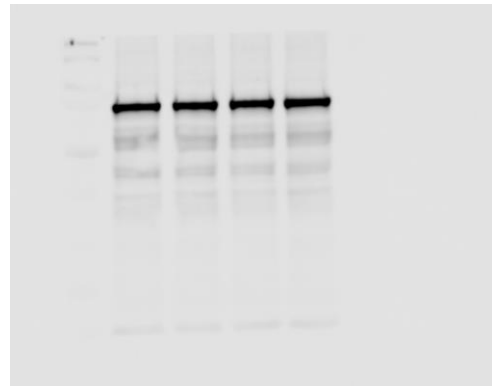

WB image (Fig. 3B) for pMLKL(Ser358)  
was cropped from this image

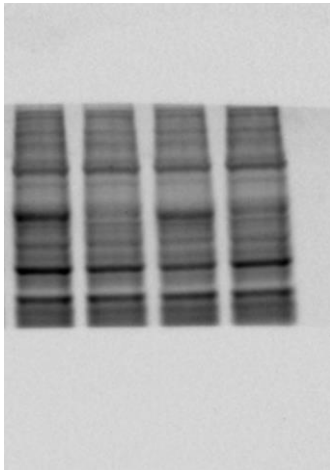

WB image (Fig. 3B) for MLKL  
was cropped from this image

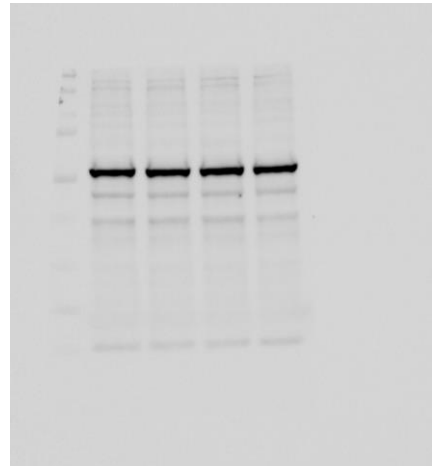

WB image (Fig. 3B) for  $\beta$ actin  
was cropped from this image

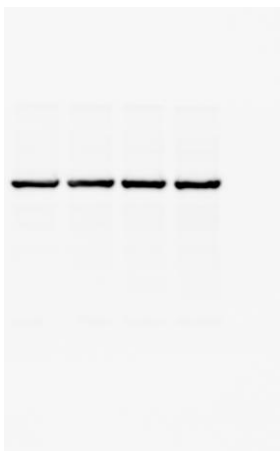

Supplement: 41598_2024_55050_MOESM1_ESM.pdf [file 41598_2024_55050_MOESM1_ESM.pdf]
