# Supplementary material for: Polyunsaturated fatty acids-induced ferroptosis suppresses pancreatic cancer growth
Source: PubMed Central journal article supplement (PMC10884029; doi:10.1038/s41598-024-55050-4), 2024-02-22
Supplement: 41598_2024_55050_MOESM3_ESM.pdf [file 41598_2024_55050_MOESM3_ESM.pdf]

## **Supplementary Video Legend**

### **Timelapse imaging of MIA-Paca2 cells treated with LA**

Timelapse imaging were performed using the microscope (BZ-X800, Keyence, Osaka, Japan) with a time-lapse imaging system. The cell tracking was started immediately after replacing the cultured medium with FA medium over 48 hours. MIA-Paca2 cells treated with 60  $\mu$ M LA continued to proliferate until around 13 h, then started swelling, ballooning, and being ruptured.
